# Supplementary material for: Circular RNA circPOSTN promotes neovascularization by regulating miR-219a-2-3p/STC1 axis and stimulating the secretion of VEGFA in glioblastoma
Source: PubMed Central journal article supplement (PMC9352789; doi:10.1038/s41420-022-01136-9), 2022-08-04
Supplement: 41420_2022_1136_MOESM2_ESM.pdf [file 41420_2022_1136_MOESM2_ESM.pdf]

F4A

U87

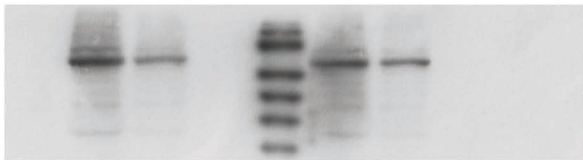

U251

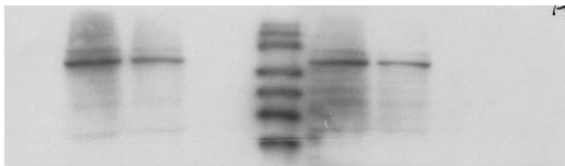

**5F**

**STC1**

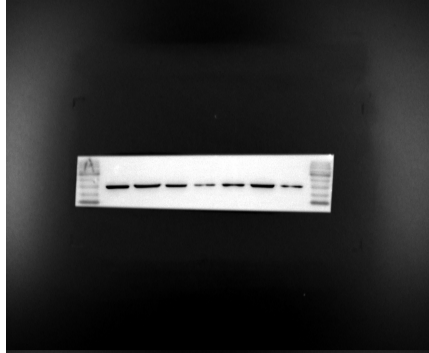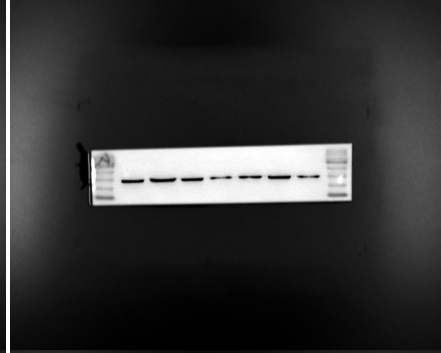

**GAPDH**

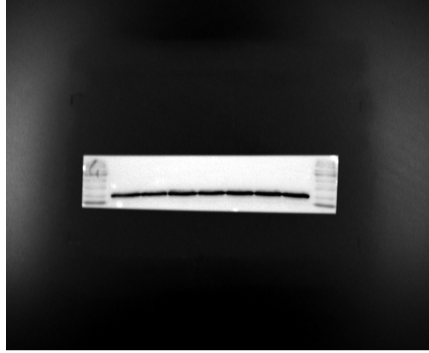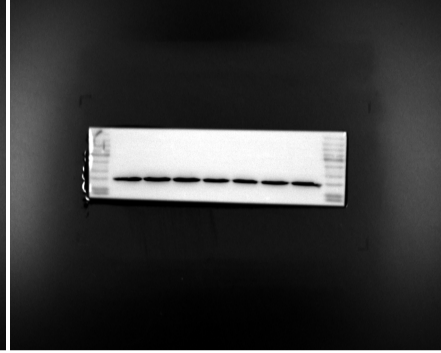

**U87**

**U251**

**7D**

**STC1**

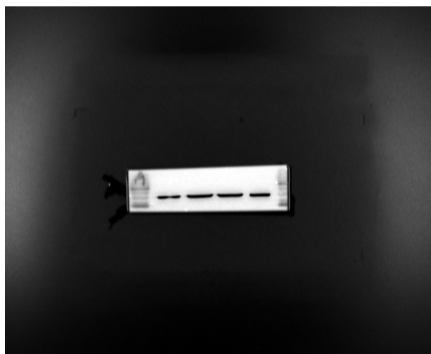

**VEGF**

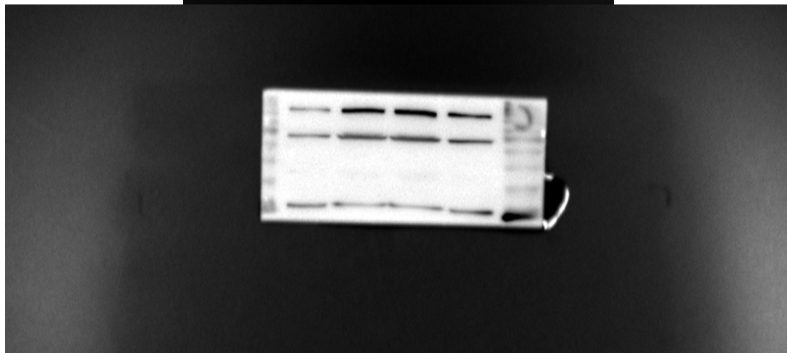

**GAPDH**

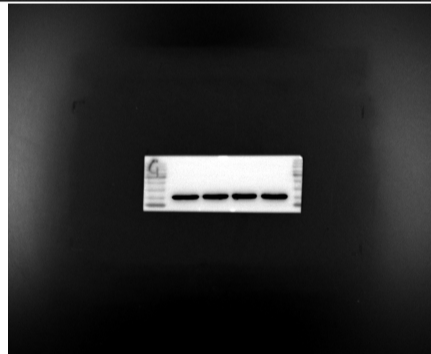

**S2**

**STC1**

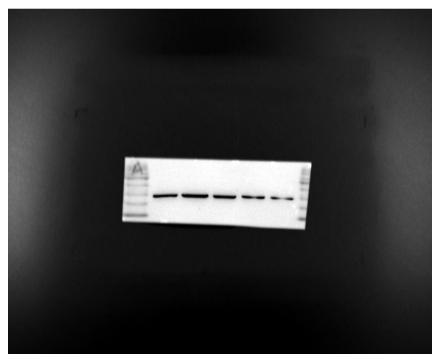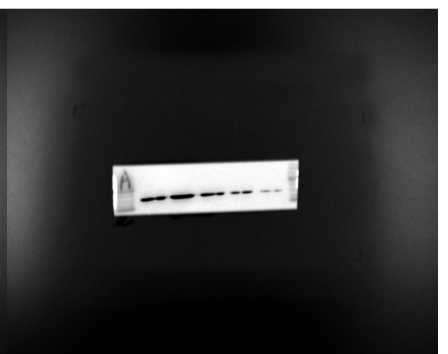

**GAPDH**

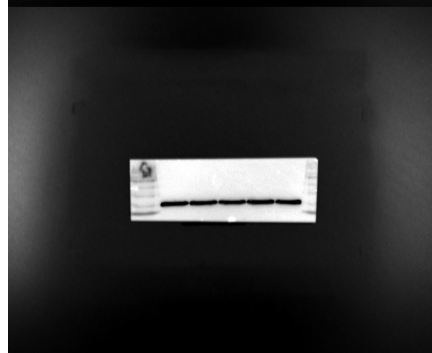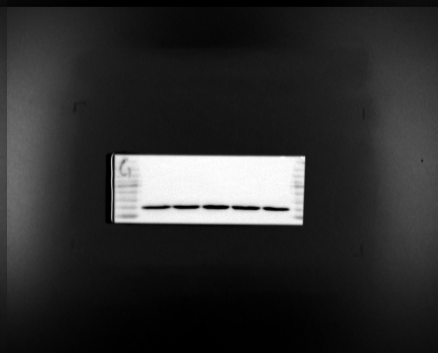

**U87**

**U251**
